# Supplementary material
Source: ML conference proceedings conference paper supplement (https://proceedings.mlr.press/v108/li20b.html)
Supplement: Supplementary file [file li20b-supp.pdf]

---

# Robust Importance Weighting for Covariate Shift

---

**Henry Lam**  
Columbia University  
khl2114@columbia.edu

**Fengpei Li**  
Columbia University  
Email fl2412@columbia.edu

**Siddharth Prusty**  
Columbia University  
siddharth.prusty@columbia.edu

## 7 Appendix

Throughout the proofs,  $h(\cdot) \in \mathcal{H}$  is assumed to be an unspecified function in the RKHS. Also, we use  $\mathbb{E}_X[\cdot]$  to denote expectation over the randomness of  $X$  while fixing others and  $\mathbb{E}_{|X}[\cdot]$  as the conditional expectation  $\mathbb{E}[\cdot|X]$ . Moreover we remark that all results involving  $\hat{g}_{\gamma, data}$  can be interpreted either as a high probability bound or a bound on expectation over  $\mathbb{E}_{data}$  (i.e., if we train  $\hat{g}_{\gamma, \mathbf{X}_{NR}^{tr}, \mathbf{Y}_{NR}^{tr}}$  using  $\mathbf{X}_{NR}^{tr}, \mathbf{Y}_{NR}^{tr}$ , then  $\mathbb{E}_{data}$  means  $\mathbb{E}_{\mathbf{X}_{NR}^{tr}, \mathbf{Y}_{NR}^{tr}}$ ). The same interpretation applies for the results with Big- $\mathcal{O}$  notations. Finally, constants  $C_2, C'_2, C_3, C'_3$  and  $C''_3$  as well as similar constants introduced later which depend on  $R, g(\cdot)$  or  $\delta$  (for  $1 - \delta$  high probability bound) will sometimes be denoted by a common  $C$  during the proofs for ease of presentation.

### 7.1 Preliminaries

**Lemma 1.** *Under Assumption 3, for any  $f \in \mathcal{H}$ , we have*

$$\|f\|_{\infty} = \sup_{x \in \mathcal{X}} |\langle f(\cdot), \Phi(\cdot, x) \rangle_{\mathcal{H}}| \leq R \|f\|_{\mathcal{H}}. \quad (1)$$

and consequently  $\|f\|_{\mathcal{L}_{P_{tr}}^2} \leq R \|f\|_{\mathcal{H}}$  as well.

**Lemma 2** (Azuma-Hoeffding). *Let  $X_1, \dots, X_n$  be independent and identically distributed random variables with  $0 \leq X \leq B$ , then*

$$P\left(\left|\frac{1}{n} \sum_{i=1}^n \mathbf{x}_i - \mathbb{E}[X]\right| > \epsilon\right) \leq 2e^{-\frac{2n\epsilon^2}{B^2}}. \quad (2)$$

**Corollary 2.** *Under the same assumption of Lemma 2, with probability at least  $1 - \delta$ ,*

$$\left|\frac{1}{n} \sum_{i=1}^n \mathbf{x}_i - \mathbb{E}[X]\right| \leq B \sqrt{\frac{1}{2n} \log \frac{2}{\delta}}. \quad (3)$$

Moreover, an important  $(1 - \delta)$ -probability bound we shall use later for  $\hat{L}(\boldsymbol{\beta}_{|\mathbf{x}_1^{tr}, \dots, \mathbf{x}_{n_{tr}}^{tr}})$  follows from [Yu and Szepesvári, 2012] (see also [Gretton et al., 2009] and [Pinelis et al., 1994]):

$$\begin{aligned} \hat{L}(\boldsymbol{\beta}_{|\mathbf{x}_1^{tr}, \dots, \mathbf{x}_{n_{tr}}^{tr}}) &= \left\| \frac{1}{n_{tr}} \sum_{j=1}^{n_{tr}} \beta(\mathbf{x}_j^{tr}) \Phi(\mathbf{x}_j^{tr}) - \frac{1}{n_{te}} \sum_{i=1}^{n_{te}} \Phi(\mathbf{x}_i^{te}) \right\|_{\mathcal{H}} \\ &\leq \sqrt{2 \log \frac{2}{\delta}} R \sqrt{\left(\frac{B^2}{n_{tr}} + \frac{1}{n_{te}}\right)}. \end{aligned} \quad (4)$$

## 7.2 Learning Theory Estimates

To adopt the more realistic assumption as in [Yu and Szepesvári, 2012, Cucker and Zhou, 2007] that the true regression function  $g(\cdot) \notin \mathcal{H}$  but rather  $g(\cdot) \in \text{Range}(\mathcal{T}_K^{\frac{\theta}{2\theta+4}})$ , we need results from learning theory.

First, define  $\zeta \triangleq \frac{\theta}{2\theta+4}$  for some  $\theta > 0$  so that  $0 < \zeta < 1/2$ . Given  $g(\cdot) \in \text{Range}(\mathcal{T}_K^\zeta)$  and  $m$  training sample  $\{(\mathbf{x}_j, y_j)\}_{j=1}^m$  (sampled from  $P_{tr}$ ), we define  $g_\gamma(\cdot) \in \mathcal{H} : \mathcal{X} \rightarrow \mathbb{R}$  to be

$$g_\gamma(\cdot) = \operatorname{argmin}_{f \in \mathcal{H}} \left\{ \|f - g\|_{\mathcal{L}_{P_{tr}}^2}^2 + \gamma \|f\|_{\mathcal{H}}^2 \right\} \quad (5)$$

where  $\|f - g\|_{\mathcal{L}_{P_{tr}}^2} = \sqrt{\mathbb{E}_{\mathbf{x} \sim P_{tr}} (f(\mathbf{x}) - g(\mathbf{x}))^2}$  denotes the  $\mathcal{L}^2$  norm under  $P_{tr}$ . On the other hand,  $\hat{g}_{\gamma, data}(\cdot) \in \mathcal{H}$  is defined in (3)

$$\hat{g}_{\gamma, data}(\cdot) = \operatorname{argmin}_{f \in \mathcal{H}} \left\{ \frac{1}{m} \sum_{j=1}^m (f(\mathbf{x}_j) - y_j)^2 + \gamma \|f\|_{\mathcal{H}}^2 \right\}.$$

Moreover, following the notations in Section 4.5 of [Cucker and Zhou, 2007], given Banach space  $(\mathcal{L}_{P_{tr}}^2, \|\cdot\|_{\mathcal{L}_{P_{tr}}^2})$  and our kernel-induced Hilbert subspace  $(\mathcal{H}, \|\cdot\|_{\mathcal{H}})$ , we define a  $\tilde{\mathbb{K}}$ -functional:  $\mathcal{L}_{P_{tr}}^2 \times (0, \infty) \rightarrow \mathbb{R}$  to be

$$\tilde{\mathbb{K}}(l, \gamma) \triangleq \inf_{f \in \mathcal{H}} \{ \|l - f\|_{\mathcal{L}_{P_{tr}}^2} + \gamma \|f\|_{\mathcal{H}} \}$$

for  $l(\cdot) \in \mathcal{L}_{P_{tr}}^2$  and  $t > 0$ . For  $0 < r < 1$ , the interpolation space  $(\mathcal{L}_{P_{tr}}^2, \mathcal{H})_r$  consists of all the elements  $l(\cdot) \in \mathcal{L}_{P_{tr}}^2$  such that

$$\|l\|_r \triangleq \sup_{\gamma > 0} \frac{\tilde{\mathbb{K}}(l, \gamma)}{\gamma^r} < \infty. \quad (6)$$

**Lemma 3.** Define  $\mathbb{K} : \mathcal{L}_{P_{tr}}^2 \times (0, \infty) \rightarrow \mathbb{R}$  to be

$$\mathbb{K}(l, \gamma) \triangleq \inf_{f \in \mathcal{H}} \{ \|l - f\|_{\mathcal{L}_{P_{tr}}^2}^2 + \gamma \|f\|_{\mathcal{H}}^2 \}. \quad (7)$$

Then for any  $l(\cdot) \in (\mathcal{L}_{P_{tr}}^2, \mathcal{H})_r$ , we have

$$\sup_{\gamma > 0} \frac{\mathbb{K}(l, \gamma)}{\gamma^r} \leq \left( \sup_{\gamma > 0} \frac{\tilde{\mathbb{K}}(l, \sqrt{\gamma})}{(\sqrt{\gamma})^r} \right)^2 = \|l\|_r^2 < \infty. \quad (8)$$

*Proof.* It follows from  $\sqrt{a+b} \leq \sqrt{a} + \sqrt{b}$ ,  $\forall a, b \geq 0$  that

$$\sqrt{\mathbb{K}(l, \gamma)} \leq \tilde{\mathbb{K}}(l, \sqrt{\gamma}). \quad (9)$$

Thus, for any  $l(\cdot) \in (\mathcal{L}_{P_{tr}}^2, \mathcal{H})_r$ , we have

$$\sup_{\gamma > 0} \frac{\mathbb{K}(l, \gamma)}{\gamma^r} \leq \left( \sup_{\gamma > 0} \frac{\tilde{\mathbb{K}}(l, \sqrt{\gamma})}{(\sqrt{\gamma})^r} \right)^2 = \|l\|_r^2 < \infty. \quad (10)$$

□

On the other hand, assuming  $g(\cdot) \in \text{Range}(\mathcal{T}_K^{\frac{\theta}{2\theta+4}})$ , it follows from the proof of Theorem 4.1 in [Cucker and Zhou, 2007] that

$$g(\cdot) \in (\mathcal{L}_{P_{tr}}^2, \mathcal{H}^+)_{\frac{\theta}{\theta+2}} \quad (11)$$

where  $\mathcal{H}^+$  is a closed subspace of  $\mathcal{H}$  spanned by eigenfunctions of the kernel  $K$  (e.g.,  $\mathcal{H}^+ = \mathcal{H}$  when  $P_{tr}$  is non-degenerate, see Remark 4.18 of [Cucker and Zhou, 2007]). Indeed, the next lemma shows we can measure smoothness through interpolation space just as range space.

**Lemma 4.** Assuming  $P_{tr}$  is non-degenerate on  $\mathcal{X}$ . Then if  $g \in \text{Range}(\mathcal{T}_K^{\frac{\theta}{2\theta+4}})$ , we have  $g \in (\mathcal{L}_{P_{tr}}^2, \mathcal{H})_{\frac{\theta}{\theta+2}}$ . On the other hand, if  $g \in (\mathcal{L}_{P_{tr}}^2, \mathcal{H})_{\frac{\theta}{\theta+2}}$ , then  $g \in \text{Range}(\mathcal{T}_K^{\frac{\theta}{2\theta+4}-\epsilon})$  for all  $\epsilon > 0$ .

*Proof.* The proof follows from Theorem 4.1, Corollary 4.17 and Remark 4.18 of [Cucker and Zhou, 2007].  $\square$

Now we are ready to adopt some common assumptions and theoretical results from learning theory in RKHS. They can be found in [Cucker and Zhou, 2007, Sun and Wu, 2009, Smale and Zhou, 2007, Yu and Szepesvári, 2012]. First, given  $g(\cdot) \in \text{Range}(\mathcal{T}_K^\zeta)$  and  $m$  training sample  $\{(\mathbf{x}_j, y_j)\}_{j=1}^m$  (sampled from  $P_{tr}$ ), it follows from Lemma 3 of [Smale and Zhou, 2007] (see as well Remark 3.3 and Corollary 3.2 in [Sun and Wu, 2009]) that

$$\|g_\gamma - g\|_{\mathcal{L}_{P_{tr}}^2} \leq C_2 \gamma^\zeta. \quad (12)$$

Second, it follows from Theorem 3.1 in [Sun and Wu, 2009] as well as [Smale and Zhou, 2007, Sun and Wu, 2010] that

$$\|g_\gamma - \hat{g}_{\gamma, data}\|_{\mathcal{L}_{P_{tr}}^2} \leq C'_2(\gamma^{-1/2}m^{-1/2} + \gamma^{-1}m^{-3/4}), \quad (13)$$

and, by the triangle inequality,

$$\|g - \hat{g}_{\gamma, data}\|_{\mathcal{L}_{P_{tr}}^2} \leq C_3(\gamma^\zeta + \gamma^{-1/2}m^{-1/2} + \gamma^{-1}m^{-3/4}). \quad (14)$$

Notice here that by choosing  $\gamma = m^{-\frac{3}{4(1+\zeta)}}$ , we recover Corollary 3.2 of [Sun and Wu, 2009]. Finally it follows from Theorem 1 of [Smale and Zhou, 2007], we have

$$\|g_\gamma - \hat{g}_{\gamma, data}\|_{\mathcal{H}} \leq C'_3 \gamma^{-1} m^{-1/2}, \quad (15)$$

with  $C'_3 = 6R \log \frac{2}{\delta}$ . In fact, if we define  $\sigma^2 \triangleq \mathbb{E}_{\mathbf{x} \sim P_{tr}} \mathbb{E}_{Y|\mathbf{x}}(g(\mathbf{x}) - Y)^2$ , then Theorem 3 of [Smale and Zhou, 2007] stated that

$$\|g_\gamma - \hat{g}_{\gamma, data}\|_{\mathcal{H}} \leq C''_3((\sqrt{\sigma^2} + \|g_\gamma - g\|_{\mathcal{L}_{P_{tr}}^2})\gamma^{-1}m^{-1/2} + \gamma^{-1}m^{-1}). \quad (16)$$

### 7.3 Main Proofs

*Proof of Theorem 1 and Corollary 1.* If  $g \in \text{Range}(\mathcal{T}_K^{\frac{\theta}{2\theta+4}})$  (i.e.  $\zeta = \frac{\theta}{2\theta+4}$ ) and we set  $h(\cdot) = g_\gamma(\cdot)$  and  $\hat{g} = \hat{g}_{\gamma, \mathbf{X}_{NR}^{tr}, \mathbf{Y}_{NR}^{tr}}$  for some  $\gamma > 0$ , then

$$\begin{aligned} & V_R(\rho) - \nu \\ &= \frac{1}{\lfloor \rho n_{tr} \rfloor} \sum_{j=1}^{\lfloor \rho n_{tr} \rfloor} \hat{\beta}(\mathbf{x}_j^{tr})(y_j^{tr} - g(\mathbf{x}_j^{tr})) + \frac{1}{\lfloor \rho n_{tr} \rfloor} \sum_{j=1}^{\lfloor \rho n_{tr} \rfloor} (\hat{\beta}(\mathbf{x}_j^{tr}) - \beta(\mathbf{x}_j^{tr}))(g(\mathbf{x}_j^{tr}) - h(\mathbf{x}_j^{tr})) \\ &+ \frac{1}{\lfloor \rho n_{tr} \rfloor} \sum_{j=1}^{\lfloor \rho n_{tr} \rfloor} (\hat{\beta}(\mathbf{x}_j^{tr}) - \beta(\mathbf{x}_j^{tr}))(h(\mathbf{x}_j^{tr}) - \hat{g}(\mathbf{x}_j^{tr})) \\ &+ \frac{1}{\lfloor \rho n_{tr} \rfloor} \sum_{j=1}^{\lfloor \rho n_{tr} \rfloor} \beta(\mathbf{x}_j^{tr})(g(\mathbf{x}_j^{tr}) - \hat{g}(\mathbf{x}_j^{tr})) + \frac{1}{n_{te}} \sum_{i=1}^{n_{te}} \hat{g}(\mathbf{x}_i^{te}) - \nu. \end{aligned} \quad (17)$$

To bound terms in (17), we first use Corollary 2 to conclude that with probability at least  $1 - \delta$ ,

$$\left| \frac{1}{\lfloor \rho n_{tr} \rfloor} \sum_{j=1}^{\lfloor \rho n_{tr} \rfloor} \hat{\beta}(\mathbf{x}_j^{tr})(y_j^{tr} - g(\mathbf{x}_j^{tr})) \right| \leq B \sqrt{\frac{1}{\lfloor \rho n_{tr} \rfloor} \log \frac{2}{\delta}} = \mathcal{O}(n_{tr}^{-1/2}). \quad (18)$$

We hold on our discussion for the second term. For the third term, since  $h, \hat{g} \in \mathcal{H}$ ,

$$\begin{aligned}
& \left| \frac{1}{\lfloor \rho n_{tr} \rfloor} \sum_{j=1}^{\lfloor \rho n_{tr} \rfloor} (\hat{\beta}(\mathbf{x}_j^{tr}) - \beta(\mathbf{x}_j^{tr}))(h(\mathbf{x}_j^{tr}) - \hat{g}(\mathbf{x}_j^{tr})) \right| \\
&= \left| \frac{1}{\lfloor \rho n_{tr} \rfloor} \sum_{j=1}^{\lfloor \rho n_{tr} \rfloor} (\hat{\beta}(\mathbf{x}_j^{tr}) - \beta(\mathbf{x}_j^{tr})) \langle h - \hat{g}, \Phi(\mathbf{x}_j^{tr}) \rangle_{\mathcal{H}} \right| \\
&= \left| \left\langle h - \hat{g}, \frac{1}{\lfloor \rho n_{tr} \rfloor} \sum_{j=1}^{\lfloor \rho n_{tr} \rfloor} (\hat{\beta}(\mathbf{x}_j^{tr}) - \beta(\mathbf{x}_j^{tr})) \Phi(\mathbf{x}_j^{tr}) \right\rangle_{\mathcal{H}} \right| \\
&\leq \|h - \hat{g}\|_{\mathcal{H}} (\hat{L}(\hat{\beta}) + \hat{L}(\beta_{|\mathbf{x}_1^{tr}, \dots, \mathbf{x}_{\lfloor \rho n_{tr} \rfloor}^{tr}})) \leq 2 \|h - \hat{g}\|_{\mathcal{H}} \hat{L}(\beta_{|\mathbf{x}_1^{tr}, \dots, \mathbf{x}_{\lfloor \rho n_{tr} \rfloor}^{tr}}), \tag{19}
\end{aligned}$$

by definition of (1). Thus, when taking  $h = g_{\gamma}$  and  $\hat{g} = \hat{g}_{\gamma, \mathbf{X}_{NR}^{tr}, \mathbf{Y}_{NR}^{tr}}$  for some  $\gamma$ , we can combine (4) and (15) to guarantee, with probability  $1 - 2\delta$ ,

$$\begin{aligned}
& \left| \frac{1}{\lfloor \rho n_{tr} \rfloor} \sum_{j=1}^{\lfloor \rho n_{tr} \rfloor} (\hat{\beta}(\mathbf{x}_j^{tr}) - \beta(\mathbf{x}_j^{tr}))(h(\mathbf{x}_j^{tr}) - \hat{g}(\mathbf{x}_j^{tr})) \right| \\
&\leq \sqrt{8 \log \frac{2}{\delta}} RC (1 - \rho)^{-1/2} (\gamma^{-1} n_{tr}^{-1/2}) \cdot \sqrt{\left( \frac{B^2}{n_{tr}} + \frac{1}{n_{te}} \right)} \\
&= \mathcal{O}(\gamma^{-1} n_{tr}^{-1/2} (n_{tr}^{-1} + n_{te}^{-1})^{\frac{1}{2}}). \tag{20}
\end{aligned}$$

For the last term  $\tau \triangleq \frac{1}{\lfloor \rho n_{tr} \rfloor} \sum_{j=1}^{\lfloor \rho n_{tr} \rfloor} \beta(\mathbf{x}_j^{tr})(g(\mathbf{x}_j^{tr}) - \hat{g}(\mathbf{x}_j^{tr})) + \frac{1}{n_{te}} \sum_{i=1}^{n_{te}} \hat{g}(\mathbf{x}_i^{te}) - \nu$ , the analysis relies the splitting of data, as we notice that

$$\begin{aligned}
& \mathbb{E}_{|\mathbf{X}_{NR}^{tr}, \mathbf{Y}_{NR}^{tr}} \left[ \frac{1}{\lfloor \rho n_{tr} \rfloor} \sum_{j=1}^{\lfloor \rho n_{tr} \rfloor} \beta(\mathbf{x}_j^{tr})(g(\mathbf{x}_j^{tr}) - \hat{g}(\mathbf{x}_j^{tr})) + \frac{1}{n_{te}} \sum_{i=1}^{n_{te}} \hat{g}(\mathbf{x}_i^{te}) - \nu \right] \\
&= \mathbb{E}_{\mathbf{x} \sim P_{tr}} [\beta(\mathbf{x})g(\mathbf{x})] - \nu - \mathbb{E}_{\mathbf{x} \sim P_{tr}} [\beta(\mathbf{x})\hat{g}(\mathbf{x})] + \mathbb{E}_{\mathbf{x} \sim P_{te}} [\hat{g}(\mathbf{x})] \\
&= \mathbb{E}_{\mathbf{x} \sim P_{te}} [g(\mathbf{x})] - \nu - \mathbb{E}_{\mathbf{x} \sim P_{te}} [\hat{g}(\mathbf{x})] + \mathbb{E}_{\mathbf{x} \sim P_{te}} [\hat{g}(\mathbf{x})] \\
&= 0. \tag{21}
\end{aligned}$$

Notice the second line follows since  $\hat{g}(\cdot)$  is determined by  $\{\mathbf{X}_{NR}^{tr}, \mathbf{Y}_{NR}^{tr}\}$  and thus is independent of  $\{\mathbf{X}_{KMM}^{tr}, \mathbf{Y}_{KMM}^{tr}\}$  or  $\{\mathbf{X}^{te}\}$ . Thus, we have

$$\begin{aligned}
\text{Var}(\tau) &= \text{Var}(\mathbb{E}_{|\mathbf{X}_{NR}^{tr}, \mathbf{Y}_{NR}^{tr}}(\tau)) + \mathbb{E}[\text{Var}_{|\mathbf{X}_{NR}^{tr}, \mathbf{Y}_{NR}^{tr}}(\tau)] \\
&= \mathbb{E}[\text{Var}_{|\mathbf{X}_{NR}^{tr}, \mathbf{Y}_{NR}^{tr}}(\tau)] \\
&= \frac{1}{\lfloor \rho n_{tr} \rfloor} \mathbb{E}[\text{Var}_{\mathbf{x} \sim P_{tr} | \mathbf{X}_{NR}^{tr}, \mathbf{Y}_{NR}^{tr}}(\beta(\mathbf{x})(g(\mathbf{x}) - \hat{g}(\mathbf{x})))] + \frac{1}{n_{te}} \mathbb{E}[\text{Var}_{\mathbf{x} \sim P_{te} | \mathbf{X}_{NR}^{tr}, \mathbf{Y}_{NR}^{tr}}(\hat{g}(\mathbf{x}))] \\
&\leq \frac{B^2}{\lfloor \rho n_{tr} \rfloor} \mathbb{E}_{\mathbf{X}_{NR}^{tr}, \mathbf{Y}_{NR}^{tr}} \|g - \hat{g}\|_{\mathcal{L}_{P_{tr}}^2}^2 + \frac{1}{n_{te}} \mathbb{E}_{\mathbf{X}_{NR}^{tr}, \mathbf{Y}_{NR}^{tr}} \|\hat{g}\|_{\mathcal{L}_{P_{te}}^2}^2 \\
&\leq \frac{B^2}{\lfloor \rho n_{tr} \rfloor} \mathbb{E}_{\mathbf{X}_{NR}^{tr}, \mathbf{Y}_{NR}^{tr}} \|g - \hat{g}\|_{\mathcal{L}_{P_{tr}}^2}^2 + \frac{B}{n_{te}} \mathbb{E}_{\mathbf{X}_{NR}^{tr}, \mathbf{Y}_{NR}^{tr}} \|\hat{g}\|_{\mathcal{L}_{P_{tr}}^2}^2, \tag{22}
\end{aligned}$$

and we can use the Chebyshev inequality and Lemma 1 to conclude, with probability at least  $1 - \delta$ ,

$$|\tau| \leq \sqrt{\frac{1}{\delta}} \sqrt{\frac{B^2}{\lfloor \rho n_{tr} \rfloor} \mathbb{E}_{\mathbf{X}_{NR}^{tr}, \mathbf{Y}_{NR}^{tr}} \|g - \hat{g}\|_{\mathcal{L}_{P_{tr}}^2}^2 + \frac{BR^2}{n_{te}}}, \tag{23}$$

which becomes, by (14), with probability  $1 - 2\delta$ ,

$$\begin{aligned} |\tau| &\leq \sqrt{\frac{1}{\delta}} \sqrt{\frac{B^2}{[\rho n_{tr}]} C(1-\rho)^{-3/4} (\gamma^\zeta + \gamma^{-1/2} n_{tr}^{-1/2} + \gamma^{-1} n_{tr}^{-3/4}) + \frac{BR^2}{n_{te}}} \\ &= \mathcal{O}((\gamma^\zeta + \gamma^{-1/2} n_{tr}^{-1/2} + \gamma^{-1} n_{tr}^{-3/4}) n_{tr}^{-1/2} + n_{te}^{-1/2}) \end{aligned} \quad (24)$$

with  $\zeta = \frac{\theta}{2\theta+4}$ . Now, to bound the second term  $\frac{1}{[\rho n_{tr}]} \sum_{j=1}^{\lfloor \rho n_{tr} \rfloor} (\hat{\beta}(\mathbf{x}_j^{tr}) - \beta(\mathbf{x}_j^{tr}))(g(\mathbf{x}_j^{tr}) - h(\mathbf{x}_j^{tr}))$ , we have

$$\begin{aligned} &\frac{1}{[\rho n_{tr}]} \sum_{j=1}^{\lfloor \rho n_{tr} \rfloor} |(\hat{\beta}(\mathbf{x}_j^{tr}) - \beta(\mathbf{x}_j^{tr}))(g(\mathbf{x}_j^{tr}) - g_\gamma(\mathbf{x}_j^{tr}))| \\ &\leq \frac{B}{[\rho n_{tr}]} \sum_{j=1}^{\lfloor \rho n_{tr} \rfloor} |g(\mathbf{x}_j^{tr}) - g_\gamma(\mathbf{x}_j^{tr})| \\ &\leq \left| \frac{B}{[\rho n_{tr}]} \sum_{j=1}^{\lfloor \rho n_{tr} \rfloor} |g(\mathbf{x}_j^{tr}) - g_\gamma(\mathbf{x}_j^{tr})| - B \|g - g_\gamma\|_{\mathcal{L}_{P_{tr}}^1} \right| + B \|g - g_\gamma\|_{\mathcal{L}_{P_{tr}}^1} \\ &\leq \sqrt{\frac{1}{\delta}} \sqrt{\frac{B^2}{\rho n_{tr}} \|g - g_\gamma\|_{\mathcal{L}_{P_{tr}}^2}^2} + B \|g - g_\gamma\|_{\mathcal{L}_{P_{tr}}^2} \\ &\leq \sqrt{\frac{1}{\delta}} BC \gamma^\zeta \sqrt{\frac{1}{\rho n_{tr}}} + C \gamma^\zeta = \mathcal{O}(\gamma^\zeta) = \mathcal{O}(\gamma^{\frac{\theta}{2\theta+4}}). \end{aligned} \quad (25)$$

where  $\mathcal{L}_{P_{tr}}^1$  denotes the 1-norm  $\mathbb{E}_{\mathbf{x} \sim P_{tr}} |g(\mathbf{x}) - g_\gamma(\mathbf{x})|$ . Notice the second-to-last line follows from the Chebyshev inequality, the Cauchy-Schwarz inequality, and the last line from (12).

Thus, when taking  $h = g_\gamma$  and  $\hat{g} = \hat{g}_{\gamma, \mathbf{X}_{NR}^{tr}, \mathbf{Y}_{NR}^{tr}}$  for some  $\gamma > 0$ , we can combine (18), (20), (24) and (25) to have

$$\begin{aligned} |V_R(\rho) - \nu| &= \mathcal{O}(n_{tr}^{-\frac{1}{2}}) + \mathcal{O}(\gamma^{\frac{\theta}{2\theta+4}}) + \mathcal{O}(\gamma^{-1} n_{tr}^{-1/2} (n_{tr}^{-1} + n_{te}^{-1})^{\frac{1}{2}}) \\ &\quad + \mathcal{O}((\gamma^{\frac{\theta}{2\theta+4}} + \gamma^{-1/2} n_{tr}^{-1/2} + \gamma^{-1} n_{tr}^{-3/4}) n_{tr}^{-1/2} + n_{te}^{-1/2}) \\ &= \mathcal{O}(n_{tr}^{-\frac{1}{2}} + n_{te}^{-\frac{1}{2}} + \gamma^{\frac{\theta}{2\theta+4}} + \gamma^{-\frac{1}{2}} n_{tr}^{-1} + \gamma^{-\frac{1}{2}} n_{tr}^{-\frac{1}{2}} n_{te}^{-\frac{1}{2}}), \end{aligned} \quad (26)$$

after simplification. Now, if we take  $\gamma = n^{-\frac{\theta+2}{\theta+1}}$  where  $n \triangleq \min(n_{tr}, n_{te})$ , then (26) becomes

$$\begin{aligned} &|V_R(\rho) - \nu| \\ &= \mathcal{O}(n^{-\frac{1}{2}} + n^{-\frac{\theta}{2(\theta+1)}} + n^{\frac{\theta+2}{2(\theta+1)}} n^{-1}) = \mathcal{O}(n^{-\frac{\theta}{2\theta+2}}) = \mathcal{O}(n_{tr}^{-\frac{\theta}{(2\theta+2)}} + n_{te}^{-\frac{\theta}{(2\theta+2)}}), \end{aligned} \quad (27)$$

which is the statement of the theorem. However, note that if we choose  $\gamma = n^{-1}$ , we would achieve the convergence rate of  $V_{KMM}$  as  $\mathcal{O}(n_{tr}^{-\frac{\theta}{(2\theta+4)}} + n_{te}^{-\frac{\theta}{(2\theta+4)}})$ . Moreover if  $\lim_{n \rightarrow \infty} n_{te}^{\frac{6\theta+8}{3\theta+6}} / n_{tr} \rightarrow 0$  and we choose  $\gamma = n_{tr}^{-1}$ , then the rate becomes  $\mathcal{O}(n_{tr}^{-\frac{\theta}{2\theta+4}} + n_{te}^{-\frac{1}{2}})$ .  $\square$

*Proof of Proposition 1.* Fixing  $\gamma > 0$ , if  $g \in \mathcal{H}$  (i.e.,  $g \in \text{Range}(\mathcal{T}_K^{\frac{\theta}{2\theta+4}})$  with  $\theta \rightarrow \infty$ ), then by definition of  $g_\gamma$  we would have

$$\|g_\gamma\|_{\mathcal{H}}^2 \leq \frac{\|g_\gamma - g\|_{\mathcal{L}_{P_{tr}}^2}^2 + \gamma \|g_\gamma\|_{\mathcal{H}}^2}{\gamma} \leq \frac{\|g - g\|_{\mathcal{L}_{P_{tr}}^2}^2 + \gamma \|g\|_{\mathcal{H}}^2}{\gamma} = \|g\|_{\mathcal{H}}^2, \quad (28)$$

or equivalently  $\|g_\gamma\|_{\mathcal{H}} = \mathcal{O}(1)$  since the fixed true regression function  $\|g\|_{\mathcal{H}} = \mathcal{O}(1)$ . Thus, a simplified analysis shows

$$\begin{aligned} V_R(\rho) - \nu &= \frac{1}{\lfloor \rho n_{tr} \rfloor} \sum_{j=1}^{\lfloor \rho n_{tr} \rfloor} \hat{\beta}(\mathbf{x}_j^{tr}) Y_j^{tr} - \nu \\ &\quad + \frac{1}{\lfloor \rho n_{tr} \rfloor} \sum_{j=1}^{\lfloor \rho n_{tr} \rfloor} \hat{\beta}(\mathbf{x}_j^{tr}) \hat{g}(\mathbf{x}_j^{tr}) - \frac{1}{n_{te}} \sum_{i=1}^{n_{te}} \hat{g}(\mathbf{x}_i^{te}) \end{aligned} \quad (29)$$

Note that the first term on the right is nothing but the  $V_{KMM}$  estimator with  $100 \times \rho$  percent of the training data and we shall denote it as  $V_{KMM}(\rho)$  without ambiguity. For the second term, assuming  $\hat{g} = \hat{g}_{\gamma, \mathbf{X}_{NR}^{tr}, \mathbf{Y}_{NR}^{tr}}$ , is bounded by

$$\begin{aligned} &\frac{1}{\lfloor \rho n_{tr} \rfloor} \sum_{j=1}^{\lfloor \rho n_{tr} \rfloor} \hat{\beta}(\mathbf{x}_j^{tr}) \hat{g}(\mathbf{x}_j^{tr}) - \frac{1}{n_{te}} \sum_{i=1}^{n_{te}} \hat{g}(\mathbf{x}_i^{te}) \\ &= \frac{1}{\lfloor \rho n_{tr} \rfloor} \sum_{j=1}^{\lfloor \rho n_{tr} \rfloor} \hat{\beta}(\mathbf{x}_j^{tr}) \langle \hat{g}, \Phi(\mathbf{x}_j^{tr}) \rangle_{\mathcal{H}} - \frac{1}{n_{te}} \sum_{i=1}^{n_{te}} \langle \hat{g}, \Phi(\mathbf{x}_i^{te}) \rangle_{\mathcal{H}} \\ &= \left\langle \hat{g}, \frac{1}{\lfloor \rho n_{tr} \rfloor} \sum_{j=1}^{\lfloor \rho n_{tr} \rfloor} \hat{\beta}(\mathbf{x}_j^{tr}) \Phi(\mathbf{x}_j^{tr}) - \frac{1}{n_{te}} \sum_{i=1}^{n_{te}} \Phi(\mathbf{x}_i^{te}) \right\rangle_{\mathcal{H}} \leq \|\hat{g}_{\gamma, \mathbf{X}_{NR}^{tr}, \mathbf{Y}_{NR}^{tr}}\|_{\mathcal{H}} \hat{L}(\hat{\beta}), \end{aligned} \quad (30)$$

Then, by (29) and (30), we have

$$\begin{aligned} |V_R(\rho) - \nu| &\leq |V_{KMM}(\rho) - \nu| + \hat{L}(\hat{\beta}) (\|\hat{g}_{\gamma, \mathbf{X}_{NR}^{tr}, \mathbf{Y}_{NR}^{tr}}\|_{\mathcal{H}} + \|g_\gamma\|_{\mathcal{H}}) \\ &= \mathcal{O}(n_{tr}^{-\frac{1}{2}} + n_{te}^{-\frac{1}{2}}), \end{aligned} \quad (31)$$

following (28), (15) and Theorem 1 of [Yu and Szepesvári, 2012].  $\square$

*Proof of Proposition 2.* If the function  $g$  only satisfies the condition  $\mathcal{A}_\infty(g, F) \triangleq \inf_{\|f\|_{\mathcal{H}} \leq F} \|g - f\| \leq C(\log F)^{-s}$  for some  $C, s > 0$ , then we again follow the analysis in the proof of Proposition 1 and arrive at the decomposition in (29)

$$\begin{aligned} |V_R(\rho) - \nu| &\leq |V_{KMM}(\rho) - \nu| + \hat{L}(\hat{\beta}) (\|\hat{g}_{\gamma, \mathbf{X}_{NR}^{tr}, \mathbf{Y}_{NR}^{tr}}\|_{\mathcal{H}} + \|g_\gamma\|_{\mathcal{H}}) \\ &= \mathcal{O}\left(\log \frac{n_{tr} n_{te}}{n_{tr} + n_{te}}\right)^{-s}, \end{aligned} \quad (32)$$

which is the rate of  $V_{KMM}$  by Theorem 3 of [Yu and Szepesvári, 2012].  $\square$

*Proof of Theorem 2.* Define  $\epsilon \triangleq \sup_{\theta \in \mathcal{D}} \left| V_R(\theta) - \mathbb{E}[l'(X^{te}, Y^{te}; \theta)] \right|$ . We have

$$\mathbb{E}[l'(X_{te}, Y_{te}; \hat{\theta}_R)] - \epsilon \leq V_R(\hat{\theta}_R) \leq V_R(\theta^*) \leq \mathbb{E}[l'(X_{te}, Y_{te}; \theta^*)] + \epsilon. \quad (33)$$

On the other hand, we know by the triangle inequality that  $\epsilon$  is bounded by

$$\begin{aligned} &\sup_{\theta \in \mathcal{D}} \left| \frac{1}{\lfloor \rho n_{tr} \rfloor} \sum_{j=1}^{\lfloor \rho n_{tr} \rfloor} \hat{\beta}(\mathbf{x}_j^{tr}) l'(\mathbf{x}_j^{tr}, y_j^{tr}; \theta) - \frac{1}{n_{te}} \sum_{i=1}^{n_{te}} l(\mathbf{x}_i^{te}; \theta) \right| \\ &+ \sup_{\theta \in \mathcal{D}} \left| \frac{1}{\lfloor \rho n_{tr} \rfloor} \sum_{j=1}^{\lfloor \rho n_{tr} \rfloor} \hat{\beta}(\mathbf{x}_j^{tr}) \hat{l}(\mathbf{x}_j^{tr}; \theta) - \frac{1}{n_{te}} \sum_{i=1}^{n_{te}} \hat{l}(\mathbf{x}_i^{te}; \theta) \right| + \sup_{\theta \in \mathcal{D}} \left| \frac{1}{n_{te}} \sum_{i=1}^{n_{te}} l(\mathbf{x}_i^{te}; \theta) - \mathbb{E}[l(X_{te}; \theta)] \right|, \end{aligned}$$

where the first term is bounded by  $\mathcal{O}(n_{tr}^{-\frac{1}{2}} + n_{te}^{-\frac{1}{2}})$  following Corollary 8.9 in [Gretton et al., 2009]. Moreover, the second term is also  $\mathcal{O}(n_{tr}^{-\frac{1}{2}} + n_{te}^{-\frac{1}{2}})$  as in (30) or Lemma 8.7 in [Gretton et al., 2009]. For the last term, due to the Lipschitz and compact assumption, it follows from Theorem 19.5 of [Van der Vaart, 2000] (see also Example 19.7 of [Van der Vaart, 2000]) that function class  $\mathcal{G}$  is  $P_{te}$ -Donsker, which means that

$$\mathbb{G}_n(\theta) \triangleq \sqrt{n_{te}} \left( \frac{1}{n_{te}} \sum_{i=1}^{n_{te}} l(\mathbf{x}_i^{te}; \theta) - \mathbb{E}_{\mathbf{x} \sim P_{te}}[l(\mathbf{x}; \theta)] \right)$$

converges in distribution to a Gaussian Process  $\mathbb{G}_\infty$  with zero mean and covariance function  $\text{Cov}(\mathbb{G}_\infty(\theta_1), \mathbb{G}_\infty(\theta_2)) = \mathbb{E}_{\mathbf{x} \sim P_{te}}(l(\mathbf{x}; \theta_1)l(\mathbf{x}; \theta_2)) - \mathbb{E}_{\mathbf{x} \sim P_{te}} l(\mathbf{x}; \theta_1) \mathbb{E}_{\mathbf{x} \sim P_{te}} l(\mathbf{x}; \theta_2)$ . Notice  $\mathbb{G}_\infty$  can be viewed as random function in  $C(\mathcal{D})$ , the space of continuous and bounded function on  $\theta$ . Since for any  $z \in C(\mathcal{D})$ , the mapping  $z \rightarrow \|z\|_\infty \triangleq \sup_{\theta \in \mathcal{D}} z(\theta)$  is continuous with respect to the supremum norm, it follows from the continuous-mapping theorem that  $n_{te}^{\frac{1}{2}} \sup_{\theta \in \mathcal{D}} \left| \frac{1}{n_{te}} \sum_{i=1}^{n_{te}} l(\mathbf{x}_i^{te}; \theta) - \mathbb{E}[l(X_{te}; \theta)] \right|$  converges in distribution to  $\|\mathbb{G}_\infty\|_\infty$  which has finite expectations based on the assumptions on  $\mathcal{G}$  (see, e.g., Section 14, Theorem 1 of [Lifshits, 2013]). Thus, by definition of convergence in distribution, for any  $\delta > 0$ , we can find some constant  $D'$  that

$$P(\|\mathbb{G}_n\|_\infty > D') = P(\|\mathbb{G}_\infty\|_\infty > D') + o(1) \leq \delta + o(1), \quad (34)$$

which means, we can find some  $N$  such that when  $n_{te} > N$ ,

$$P_{te} \left( \sup_{\theta \in \mathcal{D}} \left| \frac{1}{n_{te}} \sum_{i=1}^{n_{te}} l(\mathbf{x}_i^{te}; \theta) - \mathbb{E}[l(X_{te}; \theta)] \right| > n_{te}^{-\frac{1}{2}} D' \right) = P_{te}(\|\mathbb{G}_n\|_\infty > D') \leq 2\delta,$$

and consequently, with probability  $1 - 2\delta$ , we have

$$\sup_{\theta \in \mathcal{D}} \left| \frac{1}{n_{te}} \sum_{i=1}^{n_{te}} l(\mathbf{x}_i^{te}; \theta) - \mathbb{E}[l(X_{te}; \theta)] \right| \leq n_{te}^{-\frac{1}{2}} D'.$$

In other words, we also have

$$\sup_{\theta \in \mathcal{D}} \left| \frac{1}{n_{te}} \sum_{i=1}^{n_{te}} l(\mathbf{x}_i^{te}; \theta) - \mathbb{E}[l(X_{te}; \theta)] \right| = \mathcal{O}(n_{te}^{-\frac{1}{2}}),$$

which concludes our proof. □

## References

- [Bickel et al., 2007] Bickel, S., Brückner, M., and Scheffer, T. (2007). Discriminative learning for differing training and test distributions. In *Proceedings of the 24th international conference on Machine learning*, pages 81–88. ACM.
- [Blanchet and Lam, 2012] Blanchet, J. and Lam, H. (2012). State-dependent importance sampling for rare-event simulation: An overview and recent advances. *Surveys in Operations Research and Management Science*, 17(1):38–59.
- [Blitzer et al., 2006] Blitzer, J., McDonald, R., and Pereira, F. (2006). Domain adaptation with structural correspondence learning. In *Proceedings of the 2006 conference on empirical methods in natural language processing*, pages 120–128. Association for Computational Linguistics.
- [Borgwardt et al., 2006] Borgwardt, K. M., Gretton, A., Rasch, M. J., Kriegel, H.-P., Schölkopf, B., and Smola, A. J. (2006). Integrating structured biological data by kernel maximum mean discrepancy. *Bioinformatics*, 22(14):e49–e57.
- [Cortes et al., 2008] Cortes, C., Mohri, M., Riley, M., and Rostamizadeh, A. (2008). Sample selection bias correction theory. In *International conference on algorithmic learning theory*, pages 38–53. Springer.
- [Cucker and Zhou, 2007] Cucker, F. and Zhou, D. X. (2007). *Learning theory: an approximation theory viewpoint*, volume 24. Cambridge University Press.
- [Evgeniou et al., 2000] Evgeniou, T., Pontil, M., and Poggio, T. (2000). Regularization networks and support vector machines. *Advances in computational mathematics*, 13(1):1.
- [Glynn and Szechtman, 2002] Glynn, P. W. and Szechtman, R. (2002). Some new perspectives on the method of control variates. In *Monte Carlo and Quasi-Monte Carlo Methods 2000*, pages 27–49. Springer.
- [Gretton et al., 2009] Gretton, A., Smola, A., Huang, J., Schmittfull, M., Borgwardt, K., and Schölkopf, B. (2009). Covariate shift by kernel mean matching. *Dataset shift in machine learning*, 3(4):5.
- [Hachiya et al., 2008] Hachiya, H., Akiyama, T., Sugiyama, M., and Peters, J. (2008). Adaptive importance sampling with automatic model selection in value function approximation. In *AAAI*, pages 1351–1356.
- [Heckman, 1979] Heckman, J. J. (1979). Sample selection bias as a specification error. *Econometrica: Journal of the econometric society*, pages 153–161.
- [Huang et al., 2007] Huang, J., Gretton, A., Borgwardt, K., Schölkopf, B., and Smola, A. J. (2007). Correcting sample selection bias by unlabeled data. In *Advances in neural information processing systems*, pages 601–608.
- [Jiang and Zhai, 2007] Jiang, J. and Zhai, C. (2007). Instance weighting for domain adaptation in nlp. In *Proceedings of the 45th annual meeting of the association of computational linguistics*, pages 264–271.
- [Kanamori et al., 2012] Kanamori, T., Suzuki, T., and Sugiyama, M. (2012). Statistical analysis of kernel-based least-squares density-ratio estimation. *Machine Learning*, 86(3):335–367.
- [Kennedy et al., 2017] Kennedy, E. H., Ma, Z., McHugh, M. D., and Small, D. S. (2017). Non-parametric methods for doubly robust estimation of continuous treatment effects. *Journal of the Royal Statistical Society: Series B (Statistical Methodology)*, 79(4):1229–1245.
- [Lifshits, 2013] Lifshits, M. A. (2013). *Gaussian random functions*, volume 322. Springer Science & Business Media.
- [Nelson, 1990] Nelson, B. L. (1990). Control variate remedies. *Operations Research*, 38(6):974–992.
- [Pan and Yang, 2009] Pan, S. J. and Yang, Q. (2009). A survey on transfer learning. *IEEE Transactions on knowledge and data engineering*, 22(10):1345–1359.



- [Pardoe and Stone, 2010] Pardoe, D. and Stone, P. (2010). Boosting for regression transfer. In *Proceedings of the 27th International Conference on International Conference on Machine Learning*, pages 863–870. Omnipress.
- [Pinelis et al., 1994] Pinelis, I. et al. (1994). Optimum bounds for the distributions of martingales in banach spaces. *The Annals of Probability*, 22(4):1679–1706.
- [Quionero-Candela et al., 2009] Quionero-Candela, J., Sugiyama, M., Schwaighofer, A., and Lawrence, N. D. (2009). *Dataset shift in machine learning*. The MIT Press.
- [Schölkopf et al., 2001] Schölkopf, B., Herbrich, R., and Smola, A. J. (2001). A generalized representer theorem. In *International conference on computational learning theory*, pages 416–426. Springer.
- [Schölkopf et al., 2002] Schölkopf, B., Smola, A. J., Bach, F., et al. (2002). *Learning with kernels: support vector machines, regularization, optimization, and beyond*. MIT press.
- [Shimodaira, 2000] Shimodaira, H. (2000). Improving predictive inference under covariate shift by weighting the log-likelihood function. *Journal of statistical planning and inference*, 90(2):227–244.
- [Smale and Zhou, 2007] Smale, S. and Zhou, D.-X. (2007). Learning theory estimates via integral operators and their approximations. *Constructive approximation*, 26(2):153–172.
- [Sugiyama and Kawanabe, 2012] Sugiyama, M. and Kawanabe, M. (2012). *Machine learning in non-stationary environments: Introduction to covariate shift adaptation*. MIT press.
- [Sugiyama et al., 2007] Sugiyama, M., Krauledat, M., and Mäzler, K.-R. (2007). Covariate shift adaptation by importance weighted cross validation. *Journal of Machine Learning Research*, 8(May):985–1005.
- [Sugiyama et al., 2008a] Sugiyama, M., Nakajima, S., Kashima, H., Buenau, P. V., and Kawanabe, M. (2008a). Direct importance estimation with model selection and its application to covariate shift adaptation. In *Advances in neural information processing systems*, pages 1433–1440.
- [Sugiyama et al., 2008b] Sugiyama, M., Suzuki, T., Nakajima, S., Kashima, H., von Büna, P., and Kawanabe, M. (2008b). Direct importance estimation for covariate shift adaptation. *Annals of the Institute of Statistical Mathematics*, 60(4):699–746.
- [Sun and Wu, 2009] Sun, H. and Wu, Q. (2009). A note on application of integral operator in learning theory. *Applied and Computational Harmonic Analysis*, 26(3):416–421.
- [Sun and Wu, 2010] Sun, H. and Wu, Q. (2010). Regularized least square regression with dependent samples. *Advances in Computational Mathematics*, 32(2):175–189.
- [Tzeng et al., 2017] Tzeng, E., Hoffman, J., Saenko, K., and Darrell, T. (2017). Adversarial discriminative domain adaptation. In *Proceedings of the IEEE Conference on Computer Vision and Pattern Recognition*, pages 7167–7176.
- [Van der Vaart, 2000] Van der Vaart, A. W. (2000). *Asymptotic statistics*, volume 3. Cambridge university press.
- [Wen et al., 2014] Wen, J., Yu, C.-N., and Greiner, R. (2014). Robust learning under uncertain test distributions: Relating covariate shift to model misspecification. In *ICML*, pages 631–639.
- [Yao and Doretto, 2010] Yao, Y. and Doretto, G. (2010). Boosting for transfer learning with multiple sources. In *2010 IEEE Computer Society Conference on Computer Vision and Pattern Recognition*, pages 1855–1862. IEEE.
- [Yu and Szepesvári, 2012] Yu, Y. L. and Szepesvári, C. (2012). Analysis of kernel mean matching under covariate shift. In *ICML*, pages 1147–1154. Omnipress.
- [Zadrozny, 2004] Zadrozny, B. (2004). Learning and evaluating classifiers under sample selection bias. In *Proceedings of the twenty-first international conference on Machine learning*, page 114. ACM.
